# Supplementary material for: Investigation of anti-corrosive properties of o-anisidine-N-salicylidene and its nanocomposite o-anisidine-N-salicylidene/NiONPs on mild steel in 2 N HCl
Source: Royal Society of Chemistry journal article supplement (doi:10.1039/c6ra13630c), 2016-01-01
Supplement: c6ra13630c1.pdf [file c6ra13630c1.pdf]

## Supporting Information

### **Investigation of anti-corrosive properties of o-Anisidine-N-Salicylidene and its nanocomposite o-Anisidine-N-Salicylidene / NiONPs on mild steel in 2N HCl**

P. M. Wadhvani<sup>a\*</sup>, V. K. Panchal<sup>b</sup>, and N. K. Shah<sup>c</sup>

<sup>a</sup>President Science College, Shayona City, Ahmedabad-380061, Gujarat

<sup>b</sup>R.G. Shah Science College, Vasna, Ahmedabad-382170, Gujarat

<sup>c</sup>Department of Chemistry, School of Sciences, Gujarat University, Ahmedabad-380009, Gujarat

**Table S1**

Estimation of Equilibrium Adsorption Constant ( $K_{ads}$ ) and Free Energy of Adsorption ( $\Delta G^{\circ}_{ads}$ ) for o-AnNS and o-AnNS assembled on NiONPs on Mild Steel surface immersed in 2N HCl Solution

| Temperature<br>(K)                | $K_{ads}$<br>(L/mol)    | $\Delta G^{\circ}_{ads}$<br>(kJ/mol) |
|-----------------------------------|-------------------------|--------------------------------------|
| <b>o-AnNS</b>                     |                         |                                      |
| 308                               | 1.67 X 10 <sup>3</sup>  | -29.3                                |
| 318                               | 1.43 X 10 <sup>3</sup>  | -29.8                                |
| 328                               | 0.91 X 10 <sup>3</sup>  | -29.5                                |
| 338                               | 0.77 X 10 <sup>3</sup>  | -30.0                                |
| <b>o-AnNS assembled on NiONPs</b> |                         |                                      |
| 308                               | 16.13 X 10 <sup>3</sup> | -35.1                                |
| 318                               | 17.54 X 10 <sup>3</sup> | -36.5                                |
| 328                               | 16.67 X 10 <sup>3</sup> | -37.5                                |
| 338                               | 18.18 X 10 <sup>3</sup> | -38.9                                |

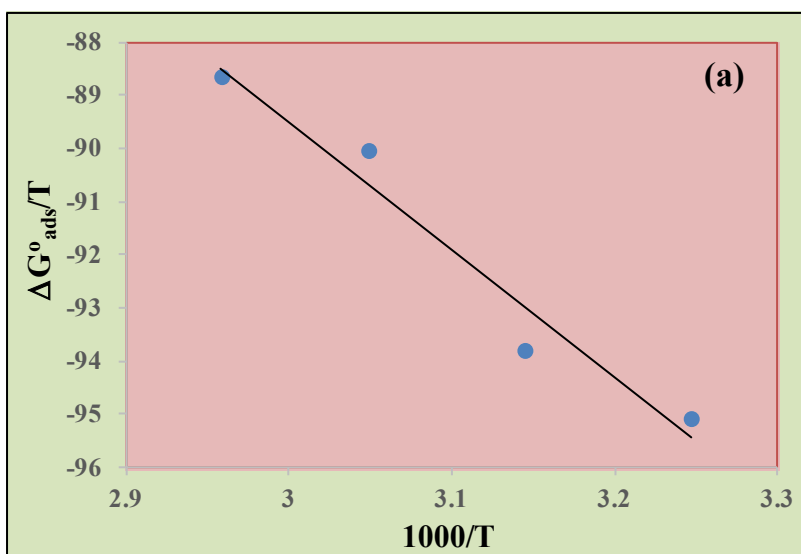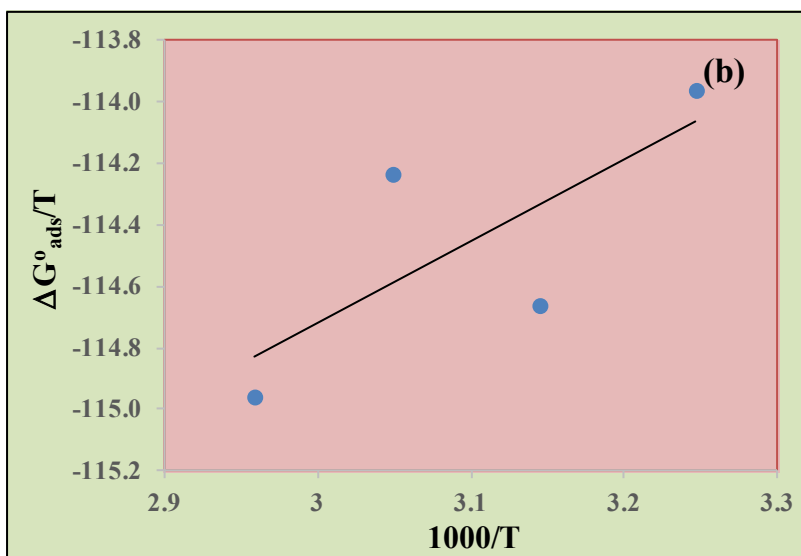

**Fig. S1:** The variation of  $\Delta G^{\circ}_{\text{ads}}/T$  with  $1/T$  for **(a)** o-AnNS and **(b)** o-AnNS assembled on NiONPs

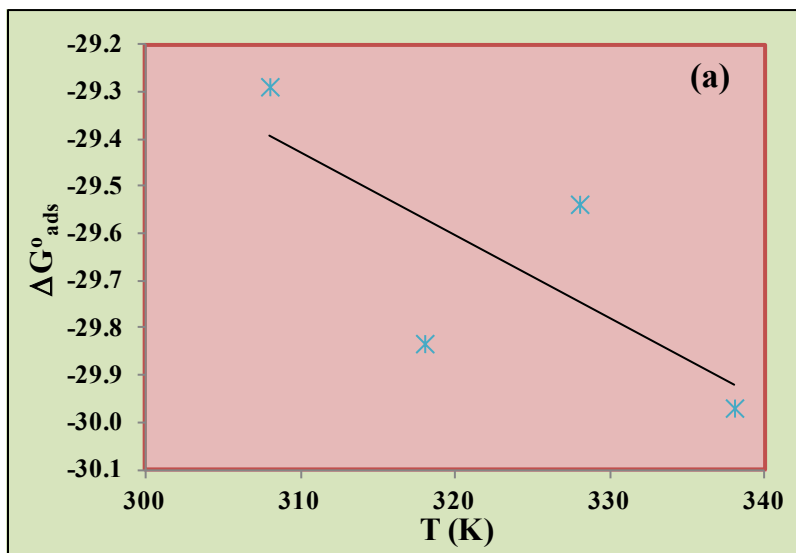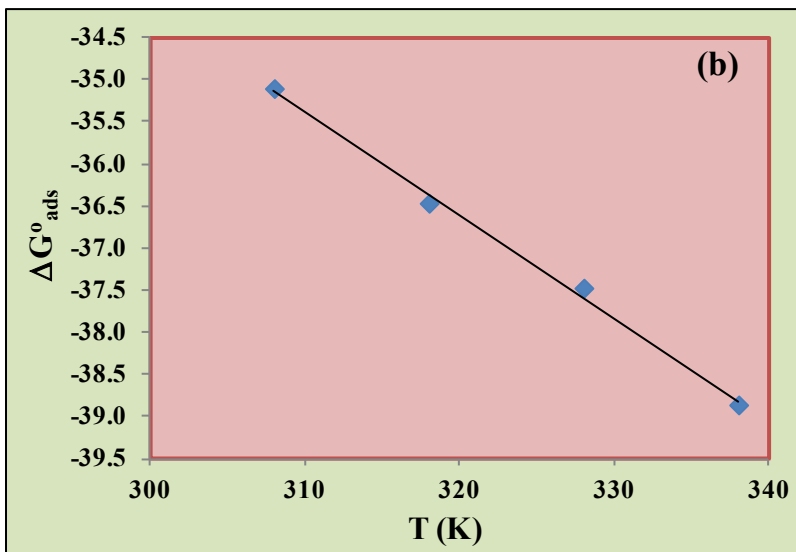

**Fig. S2:** Dependence of  $\Delta G^{\circ}_{\text{ads}}$  on temperature for mild steel in 2N HCl containing (a) o-AnNS and (b) o-AnNS assembled on NiONPs

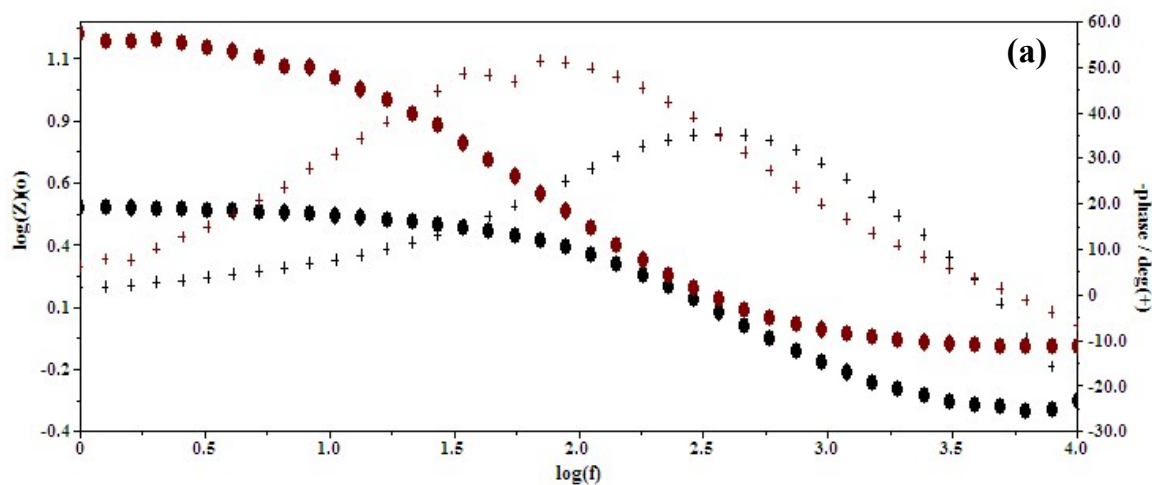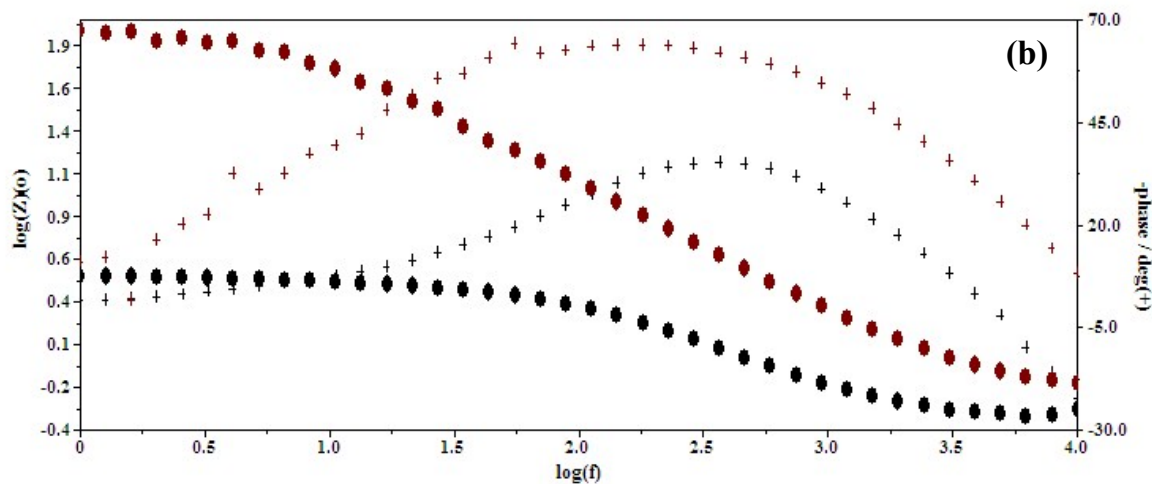

**Fig.S3:** Simulated and experimentally generated impedance diagrams for mild steel in 2N HCl and in the presence of 3.00 g L<sup>-1</sup> (a) o-AnNS and (b) o-AnNS assembled on NiONPs
